# Supplementary material for: Li7La3Zr2O12-co-LiNbO3 Surface Modification Improves the Interface Stability between Cathode and Sulfide Solid-State Electrolyte in All-Solid-State Batteries
Source: MDPI journal article supplement (doi:10.3390/membranes13020216), 2023-02-09
Supplement: s1 [file s1]

Article

# Li<sub>7</sub>La<sub>3</sub>Zr<sub>2</sub>O<sub>12</sub>-co-LiNbO<sub>3</sub> Surface Modification Improves the Interface Stability between Cathode and Sulfide Solid-State Electrolyte in All-Solid-State Batteries

Shishuo Liang <sup>1,2</sup>, Dong Yang <sup>1</sup>, Jianhua Hu <sup>1</sup>, Shusen Kang <sup>2,\*</sup>, Xue Zhang <sup>3</sup> and Yanchen Fan <sup>4,5,6,\*</sup>

<sup>1</sup> State Key Laboratory of Molecular Engineering of Polymer, Department of Macromolecular Science, Fudan University, Shanghai 200438, China

<sup>2</sup> Sunwoda Electric Vehicle Battery Company, Shenzhen 518107, China

<sup>3</sup> College of Resources and Environment, Jilin Agricultural University, Changchun 130118, China

<sup>4</sup> Petro China Shenzhen Renewable Energy Research Institute Co., Ltd., Shenzhen 518000, China

<sup>5</sup> CNPC Shenzhen New Energy Research Institute Co., Ltd., Shenzhen 518000, China

<sup>6</sup> SUSTech Academy for Advanced Interdisciplinary Studies and Department of Materials Science & Engineering, Southern University of Science and Technology, Shenzhen 518055, China

\* Correspondence: kshusen@163.com (S.K.); fanyyc@sustech.edu.cn (Y.F.);

Tel.: +15122485554 (Y.F.)

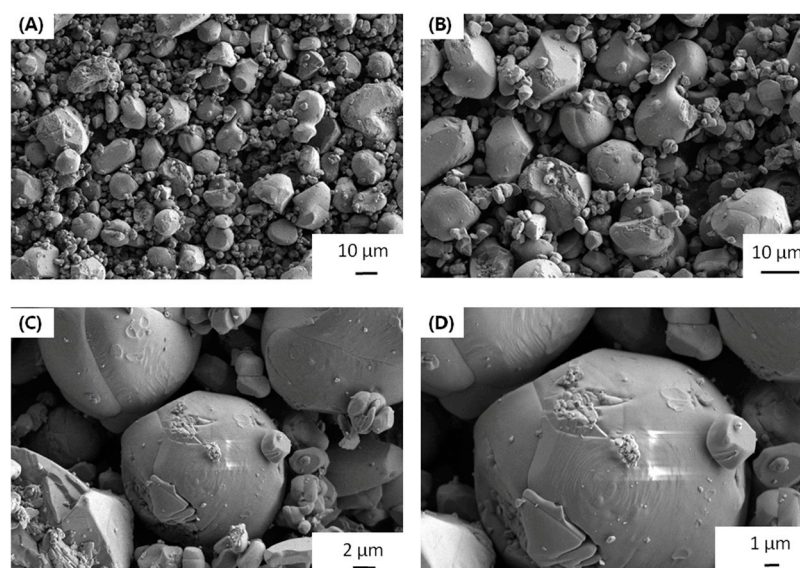

Figure S1. SEM image of LCO.

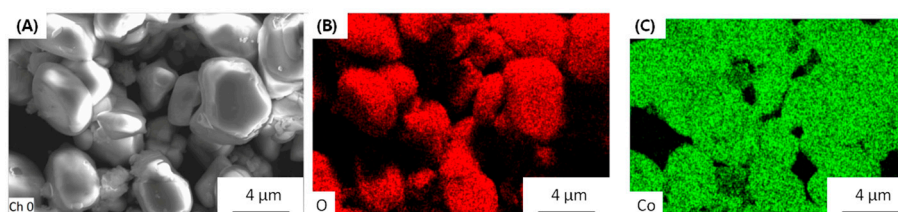

Figure S2. Elemental O, Co mapping of LCO.

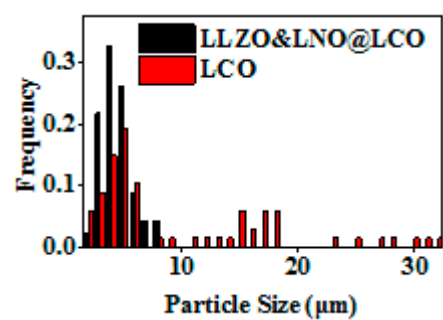

**Figure S3.** Particle size distribution of LLZO&LNO@LCO and LCO.
